# Supplementary material for: A population study of the minicircles in Trypanosoma cruzi: predicting guide RNAs in the absence of empirical RNA editing
Source: PubMed Central journal article supplement (PMC1892023; doi:10.1186/1471-2164-8-133), 2007-05-24
Supplement: 1471-2164-8-133-S3.pdf [file 1471-2164-8-133-S3.pdf]

*T. cruzi* MURF2 gRNA map

AuGuuuGGuuGuuuuAAuuuAGuuuuAuuuuuAuGUTUUUGAUUGuAGUCGUGUUUUUGAUUUUAUUUGUGUUAGAGCAUACGAUUUUUAUUUGUGAUGAUUUUGAUUUAGAUUAUAUAUUGUAUGAUUUUGUAUUUGAUUUUGU  
::|||:::|:|:|||||:|||||:|||||:|:|:|  
GUAAAUUGAUAGAUAUAAAUAUUAAAAUAAAAUACGAAGCUA (Maxicircle gRNA)

GGUAUGCAUAACAUAUUUAUAUUUAUAUUUAUUUUAGGUUUUUUCGUUAGAAUCUUCUUAGUUUUUGUAUUUGUAUUUAUUUAUUUAUAACAUAUUUUUCGGUACAUAACACAUUGUCUAUGUUUAUAUAUAUACAGGUUACUAUAUAUUU  
UACAUAUAUAUAUUUAUAUAAUUUCAUAUGUUUCUUUUUUACGUUCGGUAUUAAUUUUUCUGAUAUAUUUUUGGAAUUUUUUACGUUUUAUAUAUUUUUAUCUGUUUUUUUGAUUUUAUAAGUUUUUCAUGUUUAUUUAUAAUUU  
UUUUGGUCUAUUCUUCACAUAUUAAUAUCAUAUUUUUGUACGUAUUUGUUUUUGCUUAUUUUUAUUUUUAUAAUUUUUUUUUUUAUUUCUGUUUUUAUAUUUUUUUGUAAUACGUUGUUUAUUUGUAUUUGUAUUUCGACUUUUUAUUUUUA  
AUUUUCGAUAUUUUUAUAUCAUAUAACGUUAUGUGAUGUACAGUAUAUAGAUAUUUCGUGUGUUUCUAAUAUUUGUAUUUUAAUUUAUAUAACAUAUUUCAUAUAUGGAUUUUUAUUGUUUCAUAAUUAUAUUAGGGUAAUUUUUUUA  
UUUAUAUAUCAUGGUACUUAAUUUAUAUUUUUGGUUUUUUUUUUAUAAUUUAUGGAUUAAUAUCUUUUUCUGAUAUUUAUAUAUUUCUGAAUAUAUAUAAUAUAUAGUAGAAGUUUGUUUAUAUUUAUAAUGCCGUCUAUUUUAAUAUU  
UUUUUAAGUUUAUUUAUUUGAUGUUUUUUUAUAUUUAUAUUUAUAUUUAUUUUUGUUUCAUAAUAUGUUUUUUUAGUUUUUUUUAAAAGAUAUUUUUAUUUUUGUCAUUUGUUUUUGAUAUAUUUGGAGCACUGUUUAUUUACG  
AUUAUAACACAUAUCUCUGUAUUUUUAUACCAUUUACACCAAUUUUUGUGUAACGCAAUAUAUUUUUUUAUACGUAG

*T. cruzi* ND3 gRNA map

AuGAAUuCACGuuuAGUGuuuuAuACAuAGAuuuGuGuuuuGuuAGuuGuuuAuuuuuuGuGuuAuGACTUACCuuAuuuGuGuuuuGUUAuuuAUuuuuAuGAUAAUGuuAuuuuGuuuuuAuGuAAuuuuuuGuuuuu

: : : : | : | : : : | : : | | | : | : | | : | | | | | | |

(TCKFC46TR IIe) UGUGAGAUGGUGGAUAGAGAUUUAUUACAA

AUGGUUuuGuuuuAuAuGuGuGuAuAGGGUGUUUAuGGuAuuuuuGGGAuCCAGuAUAUUUGUGuAuAuCUUAuuAUuuuGuuuAuGGuGUUUUuuGuuAuAuGUAUUUUGUUUGAAUUCUUA AAAUAA
